# Supplementary material for: Sewage sludge treated with metal nanomaterials inhibits earthworm reproduction more strongly than sludge treated with metal metals in bulk/salt forms
Source: Royal Society of Chemistry journal article supplement (doi:10.1039/c6en00280c), 2016-12-14
Supplement: c6en00280c1.pdf [file c6en00280c1.pdf]

**Table S1:** The EC<sub>25</sub>, EC<sub>90</sub> and EC<sub>50</sub> values<sup>†</sup> and slopes (b) derived as parameter estimates from the model fits (Equation 2) for the as-synthesised Zn and Ag ENM and bulk metal soil exposures based on the total metal concentration in the soil and the earthworm body concentrations.

|                      | Total soil concentration (mg/kg) |                  |                  |                  | Earthworm body concentration (µg/g) |                  |                  |                  |
|----------------------|----------------------------------|------------------|------------------|------------------|-------------------------------------|------------------|------------------|------------------|
|                      | b                                | EC <sub>25</sub> | EC <sub>50</sub> | EC <sub>90</sub> | b                                   | EC <sub>25</sub> | EC <sub>50</sub> | EC <sub>90</sub> |
| Zn bulk metal        | 3.3                              | 185              | 310 ± 29         | 605              | 16.3                                | n.d.             | 159 ± 3.9        | n.d.             |
| Ag bulk metal        | 2.6                              | 20               | 33 ± 5.2         | 74               | 6.03                                | 5.6              | 7.4 ± 0.59       | 10.6             |
| ZnO ENM <sup>a</sup> | 4.1                              | 413              | 780 ± 109        | 1926             | 3.9                                 | 146              | 210 ± 16.3       | 369              |
| Ag ENM               | 1.5                              | 35               | 97 ± 16.6        | 420              | 7.3                                 | 12.1             | 15 ± 0.9         | 22               |

<sup>†</sup>EC<sub>50</sub> value ± standard error. <sup>a</sup>ENM = engineered nanomaterials. n.d. = not determined

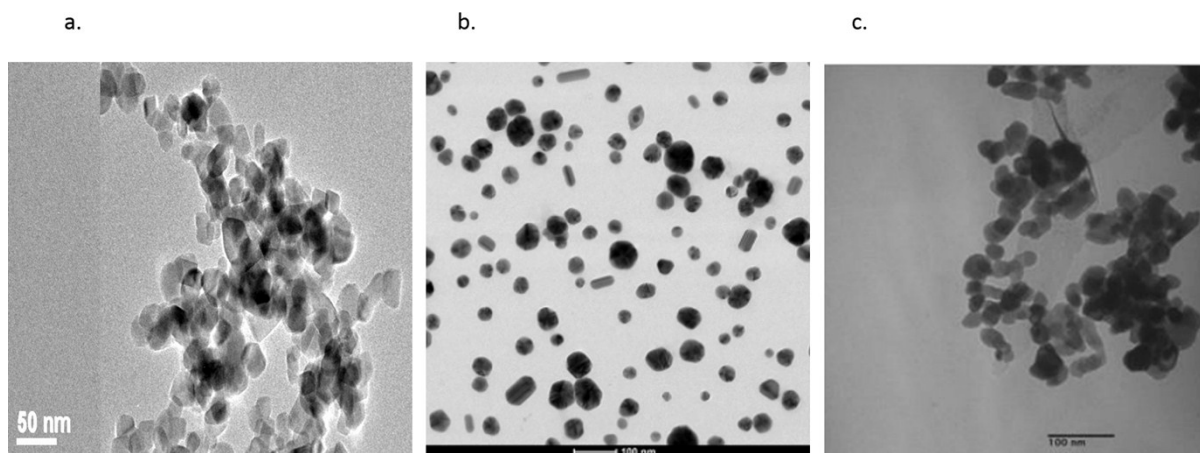

**Figure S1:** The TEM images of three different nanomaterials added to the influent of the pilot WWTP; a= TiO<sub>2</sub>, b = Ag and c = ZnO (b&c from Ma *et al.* 2014).

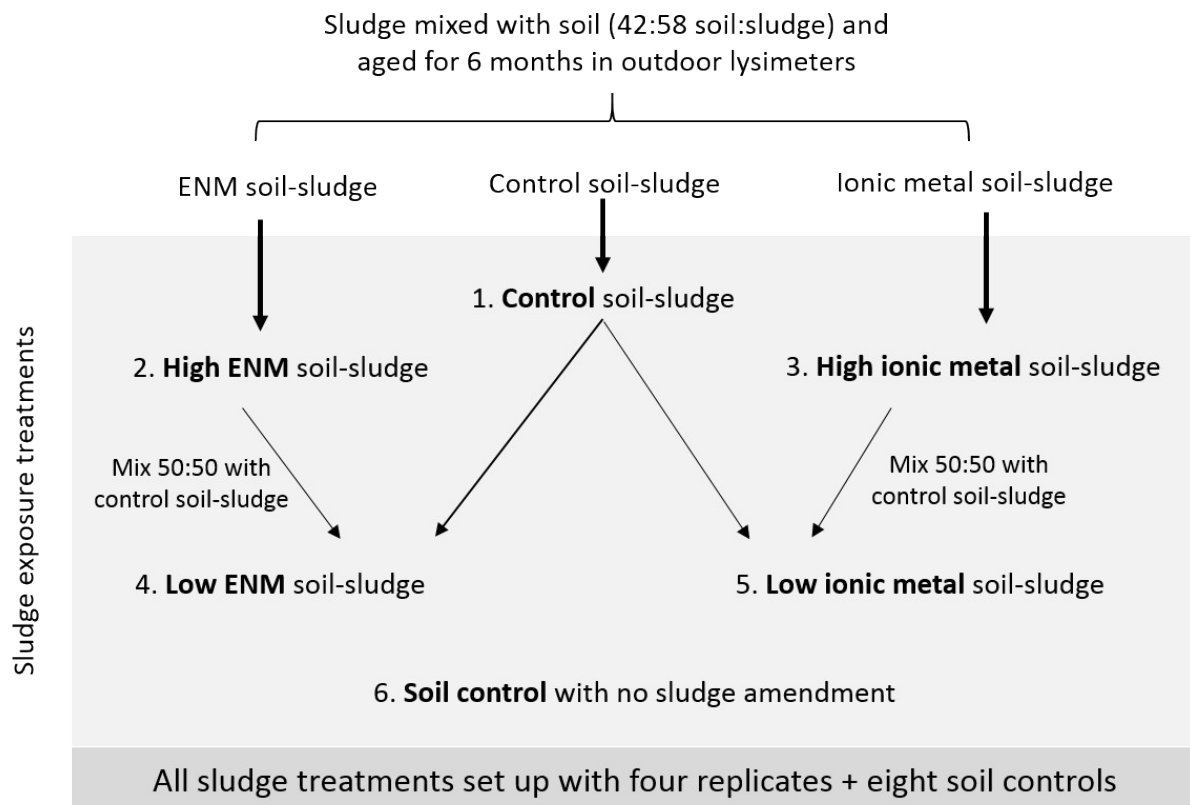

**Figure S2**
